# Supplementary material for: Outcomes Following Implantation of Two Second-Generation Trabecular Micro-Bypass Stents in Patients with Open-Angle Glaucoma on One Medication: 18-Month Follow-Up
Source: Springer Nature journal article supplement (doi:10.1007/s12325-016-0420-8), 2016-10-13
Supplement: MOESM1 [file 10869862]

## Supplementary Material

### Appendix 1. List of Participating Microinvasive Glaucoma Surgery (MIGS) Study Group Surgeons

| Surgeon Name                 | Affiliation                                                                                                                                                              | Study Participation |
|------------------------------|--------------------------------------------------------------------------------------------------------------------------------------------------------------------------|---------------------|
| Iqbal Ike K. Ahmed, MD       | University of Toronto<br>Toronto, Ontario, Canada                                                                                                                        | Visiting surgeon    |
| John P. Berdahl, MD          | Vance Thompson Vision<br>Sioux Falls, South Dakota, USA                                                                                                                  | Visiting surgeon    |
| Richard Lewis, MD            | Sacramento Eye Consultants<br>Sacramento, California, USA                                                                                                                | Visiting surgeon    |
| John A. Hovanesian, MD       | Harvard Eye Associates<br>Laguna Hills, California, USA                                                                                                                  | Visiting surgeon    |
| Jonathan Myers, MD           | Wills Eye Hospital,<br>Philadelphia, Pennsylvania, USA                                                                                                                   | Visiting surgeon    |
| Ilesh Patel, MD              | Kirribilli, New South Wales, Australia                                                                                                                                   | Visiting surgeon    |
| Douglas J. Rhee, MD          | University Hospitals / Case Medical<br>Center<br>Cleveland, Ohio, USA                                                                                                    | Visiting surgeon    |
| Steven R. Sarkisian, Jr., MD | Dean A. McGee Eye Institute<br>Univ. of Oklahoma Health Science Center<br>Oklahoma City, Oklahoma, USA                                                                   | Visiting surgeon    |
| David Manning, MD            | New South Wales, Australia                                                                                                                                               | Visiting surgeon    |
| Richard L. Lindstrom, MD     | Founder and Attending Surgeon:<br>Minnesota Eye Consultants<br>Adjunct Clinical Professor Emeritus:<br>Univ. of Minnesota Dept. of Ophth.<br>Minneapolis, Minnesota, USA | Visiting surgeon    |
| Lilit Voskanyan, MD          | S.V. Malayan Ophthalmology Centre<br>Yerevan, Armenia                                                                                                                    | Staff surgeon       |

**Medical Monitor:** L.J. Katz, MD, Wills Eye Hospital, Jefferson Medical College, Philadelphia, PA, USA. Email: [ljaykatz@gmail.com](mailto:ljaykatz@gmail.com)
